# Supplementary material
Source: publisher site journal article supplement (https://www.dovepress.com/article/401289)
Supplement: Supplementary file 1 [file get_supplementary_file.php]

**Annex 1: Standards for the establishment of a stem cell transplant facility**

| **Minimum requirement** | **Preferred requirement** | **Ideal requirement** |
| --- | --- | --- |
| **Infrastructure** | | |
| Support from the Institution (or Hospital Leadership)  Tertiary hospital care facility  Critical care unit (access to dialysis, vasopressors, or mechanical ventilation support)  Access to place a central line  Laboratories for Cell Processing  Services for apheresis a | Support from the government for new program creation or registration  Exclusive transplant unit  Units with HEPA filters  Apheresis suite  Warehouse for storing Cryopreserved cell  Transplant patients' outpatient clinic  Private rooms for patients  Available operating room for harvesting bone marrow b  Hematology/oncology wards' transplant rooms | Structure for outpatient transplants: staffed infusion room open daily |
| **Human resource** | | |
| Licensed hematologist serving as medical director with at least six months of experience in a BMT unit (Ability to build a connection with an established transplant facility is advised).  Hematologist/oncologist or immunologist serving as medical director  Hematology-oncology-experienced nurses who have had training in administering chemotherapy and controlling infection control  Pharmacy professional with expertise in chemotherapy | Added medical professionals: hematologists and oncologists  Director of the cell processing lab, MD/Ph.D. or Ph.D., with laboratory expertise in HCT  Dedicated professional in charge of PB stem cell apheresis and bone marrow collection, including staff training, aiding with arranging or carrying out the process.  Professional quality management BMT program (for accreditation)  A medical professional in charge of the associated donor workup, who is not directly responsible for the recipient's workup b  Social worker | Pre-transplant tests and schedules are organized and managed by a clinical coordinator.  A donor search coordinator is available b  Dietitian  Data manager in charge of gathering and reporting data  Pre-transplant psychological assessment by a psychologist  Professional in financial services |
| **Blood bank facility** | | |
| Leukocyte-reduced or radiation-treated blood products are available.  The availability of platelets and blood | Accreditation |  |
| **Laboratory including the cell processing laboratory** | | |
| ABO blood typing  Chemistry and Cell Counter  Immunohistochemistry  HLA typing access b  Level for tacrolimus / CSA b  Cryopreservation and storage capacity a | Level for Immunoglobulin  Access to an immunogenetic expert for consultation  Abilities for minimum graft manipulation: CD34+ cell enumeration, RBC reduction b  Space for storage and cryopreservation techniques  Expert guidance for cord blood or donor selection b  Availability of experienced personnel for conducting unrelated donor searches b  Ability to do anti-HLA antibody tests b  Analysis for Chimerism b | Possibilities for more extensive graft manipulation, such as CD34 cell selection or T-cell depletion b  Busulfan pharmacokinetics, either send out or done locally b |
| **Microbiology** | | |
| HIV, syphilis, hepatitis, HSV, and HTLV-1serologic test  PCR or antigenemia for detection of CMV b  Basic fungal and bacterial cultures | PCR or antigenemia for detection of CMV a  Access to testing for several viruses, involving molecular testing (PCR) | Assay for Galactomannan |
| **Pathology** | | |
|  | Flow cytometry  Disease indicators using PCR b | Disease indicators using PCR a |
| **Radiology** | | |
| CT and X-ray scanner | Magnetic resonance imaging, Interventional radiology | PET/CT scan, Nuclear medicine |
| **Pharmacy** | | |
| Having access to the chemotherapeutic drugs needed for the conditioning protocol  Antibiotics with broad spectrum coverage and antiemetic  Medications for antifungal prevention and/or treatment b  Drugs for prophylaxis and treatment of HSV and other viral infections (e.g. ganciclovir acyclovir, etc.) b  Drugs for GVHD treatment b  CNI is available for GVHD prevention with or without methotrexate b | Total parenteral nutrition  Pain management under patient control  Ganciclovir as a viral infection treatment a | Defibrotide b  Availability of ATG |
| **Ancillary Services(Consults)** | | |
|  | Hematopathologists  Intensivists or Critical care services  Bronchoscopy and Pulmonary services  Endoscopies and Gastroenterology services  Infectious diseases services  Radio-oncology  Ophthalmology service for chronic GVHD b  Neurology b  Gynecologist (chronic GVHD)b | Psychiatrist b |
|  | Data gathering on demographics and results using globally standardized forms  Recognition by regional, national, or international BMT quality organizations  Development of a quality program  Data exchange with national, international, or regional outcome registries  Creation of HCT program standard operating procedures that are accessible to the entire team  For at least the first year of implementation, establish a link with an established transplant program. |  |
| **Other** | | |
|  | Program of participation and instruction for junior faculty in transplantation | Availability of extracorporeal photopheresis b  Coordinators of clinical research for clinical trial creation or participation |

*a Autologous transplant, b Allogeneic transplant. Abbreviations: anti-thymocyte globulin (ATG), cytomegalovirus (CMV), cyclosporine A (CSA), computed tomography (CT), calcineurin inhibitors (CNI), graft-versus-host disease (GVHD), blood and marrow transplantation (BMT), hematopoietic cell transplantation (HCT), Herpes simplex virus (HSV), human immunodeficiency virus (HIV), human T-cell leukemia/lymphoma virus type 1 (HTLV-1), polymerase chain reaction (PCR), human leukocyte antigen (HLA), red blood cell (RBC), peripheral blood (PB), high-efficiency particulate air (HEPA), positron emission tomography (PET).*

Adapted from *Hematol Oncol Stem Cell Ther*, 13(3), Pasquini MC, Srivastava A, Ahmed SO, et al. Worldwide Network for Blood and Marrow Transplantation (WBMT) recommendations for establishing a hematopoietic cell transplantation program (Part I): minimum requirements and beyond. 131–142, Copyright 2020, with permission from Elsevier.24
